# Supplementary material
Source: PubMed Central journal article supplement (PMC6801080)

**Supplementary Figure 1. Representative images of clear cell renal cell carcinoma tissue sections immunostained for PD-L1 (brown) and CD45/CD163 (red) from patient with tumor cells negative for PD-L1(A) and patient with tumor cells positive for PD-L1 (B). Inset shows higher magnification of the selected area. Scale Bar: 100  $\mu$ m.**

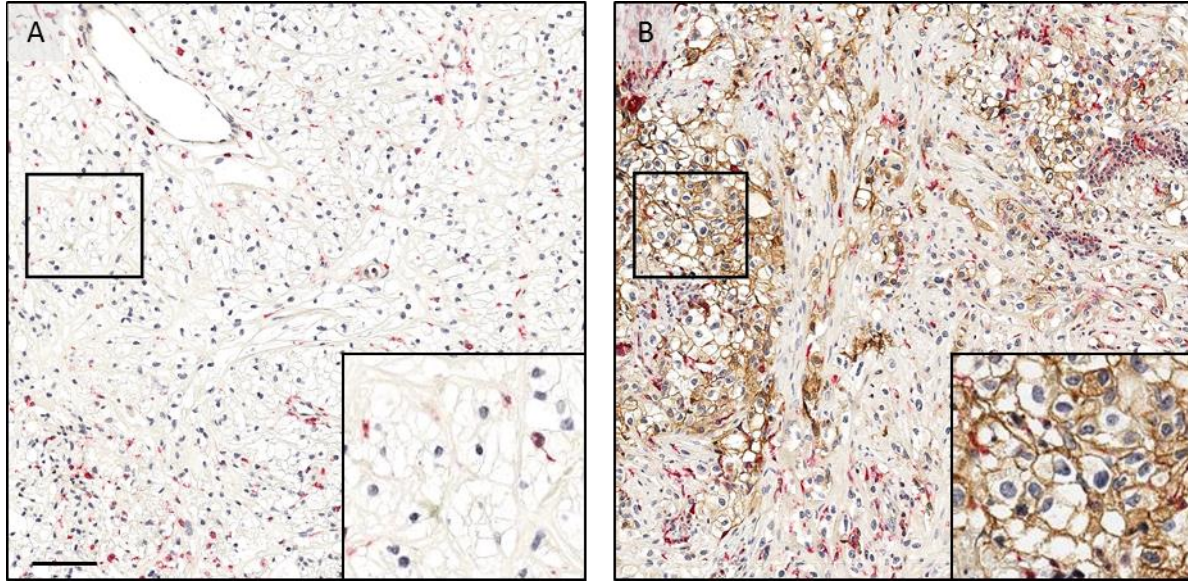

Supplement: NIHMS1536579-supplement-2.pdf [file NIHMS1536579-supplement-2.pdf]
