# Supplementary material
Source: PubMed Central journal article supplement (PMC6801080)
Supplement: NIHMS1536579-supplement-4.pdf [file NIHMS1536579-supplement-4.pdf]

Supplementary Figure 4. Immune cell density (ICD) scores by PD-L1 expression on tumor cells

(A) METEOR

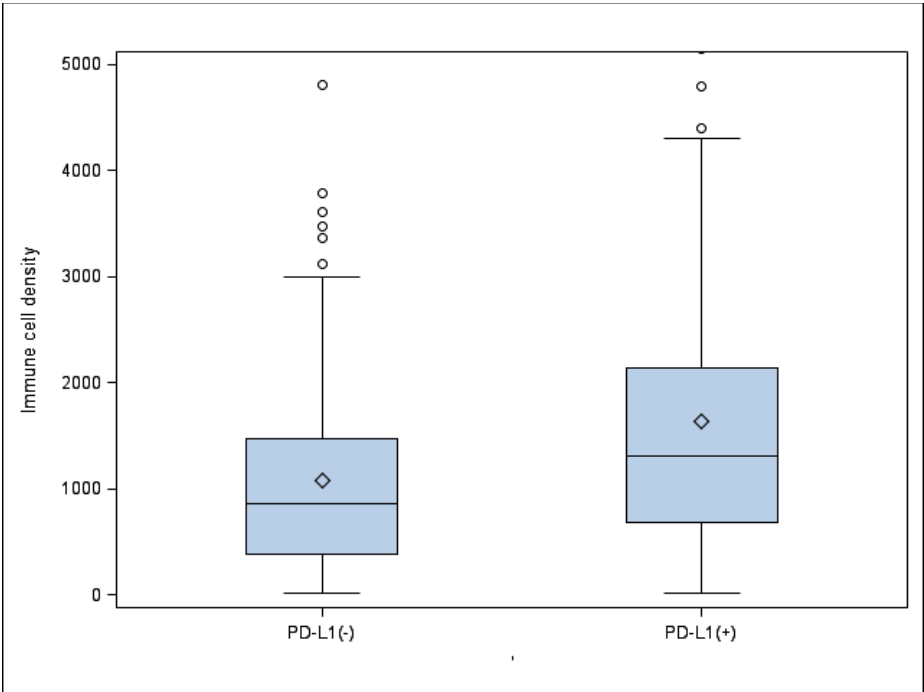

P<0.0001 (Non-parametric Kruskal-Wallis test)

(B) CABOSUN

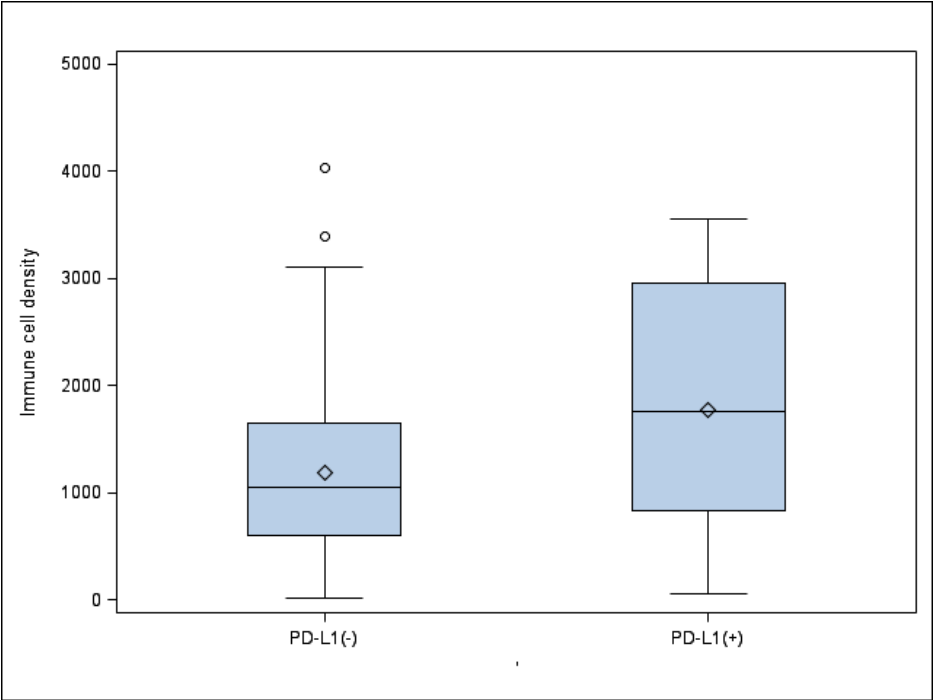

P=0.045 (Non-parametric Kruskal-Wallis test)
